# Supplementary material
Source: PubMed Central journal article supplement (PMC9247019)
Supplement: NIHMS1809286-supplement-Supplemental_Publication_Material.pdf [file NIHMS1809286-supplement-Supplemental_Publication_Material.pdf]

**Supplementary Material**  
**Cardiovascular Events after Intracerebral Hemorrhage**

Linxin Li<sup>1</sup>, DPhil; Santosh B. Murthy<sup>2</sup>, MD, MPH.

**Supplemental Table S1. Studies that Reported the Incidence of Deep Vein Thrombosis (DVT), Pulmonary Embolism (PE) and Venous Thromboembolism (VTE) after ICH**

| Year                                           | Time frame | N           | %DVT      | %PE  | % VTE | Time from onset | Independent risk factors           |                                                                              |
|------------------------------------------------|------------|-------------|-----------|------|-------|-----------------|------------------------------------|------------------------------------------------------------------------------|
| <b>Symptomatic VTE:</b>                        |            |             |           |      |       |                 |                                    |                                                                              |
| Skaf <sup>82</sup>                             | 1979-2003  | In-hospital | 1,606,000 | 1.4  | 0.7   | -               | -                                  |                                                                              |
| Goldstein <sup>83</sup>                        | 1994-2006  | In-hospital | 988       | 1.1  | 1.8   | -               | 11 days for PE and 18 days for DVT |                                                                              |
| Gregory <sup>84</sup>                          | 1999       | In-hospital | 1926      | 1.9  | 0.4   | -               | -                                  | Length of stay                                                               |
| Stecker <sup>85</sup>                          | 2008-2012  | In-hospital | 272       | -    | -     | 2.9             | -                                  | Length of stay and heart failure                                             |
| Ding <sup>86</sup>                             | 2010-2016  | In-hospital | 2902      | 2.0  | 0.7   | 3.0             | -                                  | Prior history of VTE, intubation, presence of IVH                            |
| Ji <sup>87</sup>                               | 2016       | In-hospital | 314       | 5.7  | -     | -               | 7.5 days                           | Age, admission NIHSS, length of stay                                         |
| Kim <sup>88</sup>                              | 2001-2004  | ICU         | 516       | -    | -     | 2.9             | 17 days                            | Presumed infection, immobility>72h, indwelling central venous catheter       |
| Chu <sup>89</sup>                              | 2001-2012  | ICU         | 848       | 7.0  | 1.5   | 8.1             | -                                  | Malignancy, pulmonary circulation disease, coagulopathy, age, length of stay |
| <b>Routine screening with ultrasound scan:</b> |            |             |           |      |       |                 |                                    |                                                                              |
| Yablon <sup>90</sup>                           | 1996-2001  | 24h         | 213       | 16.0 | -     | -               | -                                  | -                                                                            |
| Lacut <sup>91</sup>                            | 2002-2003  | Day 10      | -         | 16.0 | -     | -               | -                                  | -                                                                            |
| Kawase <sup>92</sup>                           | 2006       | Day 14      | 81        | 21.0 | 1.2   | -               | -                                  | Female sex                                                                   |
| Ogata <sup>93</sup>                            | 2005-2006  | Day 14      | 52        | 40.4 | 1.9   | -               | -                                  | NIHSS score and D-dimer                                                      |
| Cheng <sup>94</sup>                            | 2012-2014  | Day 15      | 210       | 26.0 | -     | -               | -                                  | NIHSS score, haematoma volume, female sex, age, D-dimer and CRP.             |

Abbreviations: DVT, deep venous thrombosis; CRP, C-Reactive Protein; ICU, intensive care unit; IVH, intraventricular hemorrhage; NIHSS, National Institutes of Health Stroke Scale; PE, pulmonary embolism; VTE, venous thromboembolism
